# Supplementary material
Source: publisher figshare collection journal article supplement (https://rs.figshare.com/ndownloader/files/9742750)
Supplement: Supplementary file 1 [file 9742750]

Associations between imprinted gene expression in the placenta, human fetal growth, and preeclampsia

Julian K. Christians, Katherine Leavey, Brian J. Cox

Electronic Supplementary Material


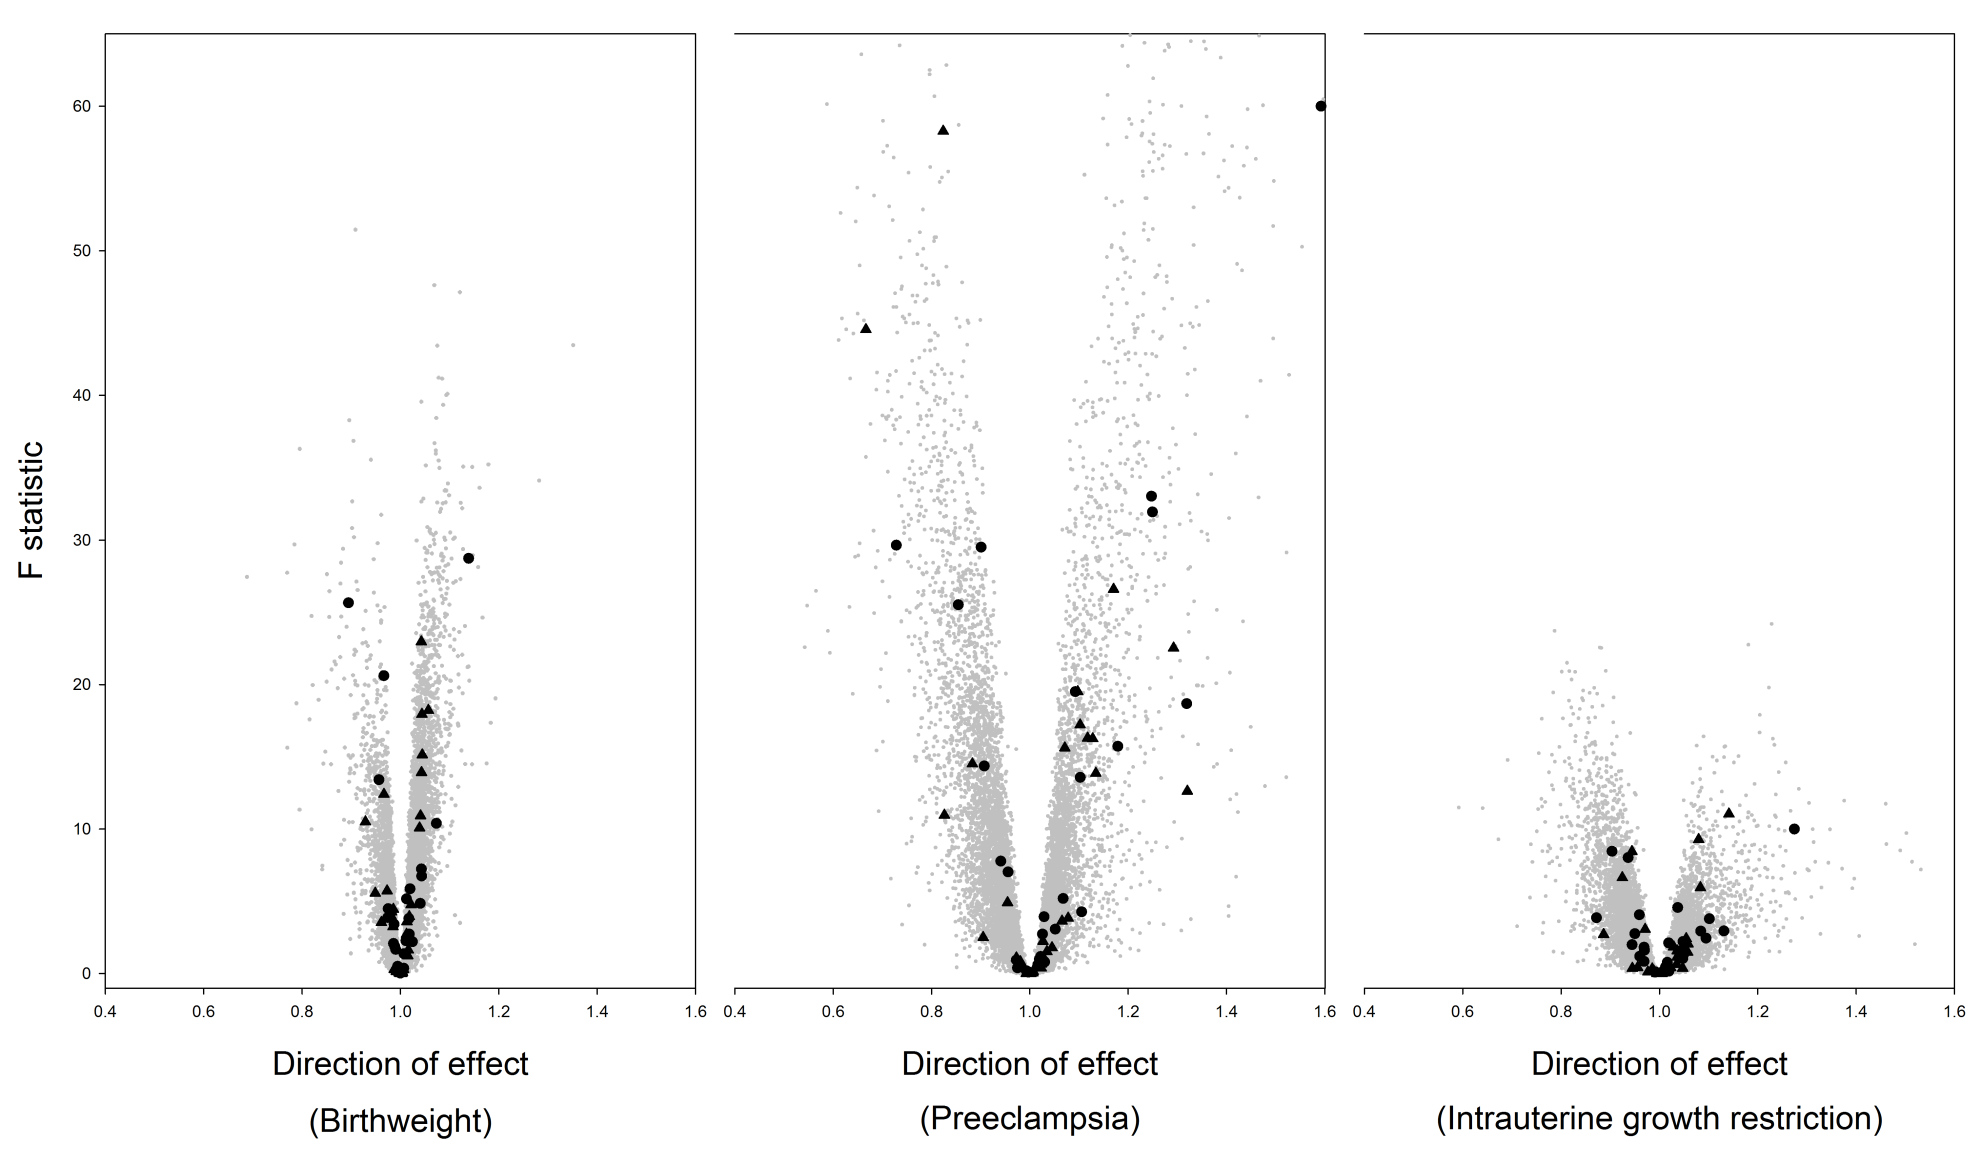


Supplementary Figure 1. Significance and pattern of (left) relationship between birthweight and gene expression, (middle) effect of PE, and (right) effect of IUGR in maternally (black circles) and paternally (black triangles) expressed genes and non-imprinted genes (gray crosshairs). Values greater than 1 indicate positive relationships or increased expression in PE/IUGR for non-imprinted genes, and the expected patterns for imprinted genes under the KT (positive relationships for paternally expressed genes and negative for maternally expressed genes) or patterns predicted by the KT to limit maternal investment in PE and IUGR. In PE, imprinted genes show a pattern expected to limit investment, as illustrated by more imprinted genes (black symbols) with effects greater than 1. More detailed description is provided in Supplementary Table 3.
